# Supplementary material for: Getting Closer to Absolute Molar Masses of Technical Lignins
Source: PubMed Central journal article supplement — ChemSusChem. 2018 Aug 21;11(18):3259–68. doi: 10.1002/cssc.201801177 (PMC6175078; doi:10.1002/cssc.201801177), 2018-08-21
Supplement: CSSC-11-3259-s001.pdf [file CSSC-11-3259-s001.pdf]

## Supporting Information

### **Getting Closer to Absolute Molar Masses of Technical Lignins**

Grigory Zinovyev<sup>+, [a]</sup> Irina Sulaeva<sup>+, [a]</sup> Stepan Podzimek,<sup>[b, c]</sup> Dierk Rössner,<sup>[b]</sup>  
Ilkka Kilpeläinen,<sup>[d]</sup> Ivan Sumerskii,<sup>[a]</sup> Thomas Rosenau,<sup>\*, [a]</sup> and Antje Potthast<sup>\*, [a]</sup>

cssc\_201801177\_sm\_miscellaneous\_information.pdf

## **Author Contributions**

*G.Z. Investigation: Equal; Writing – original draft: Equal*

*I.S. Investigation: Equal; Writing – original draft: Equal*

*S.P. Methodology: Supporting; Writing – review & editing: Supporting*

*D.R. Formal analysis: Supporting; Methodology: Supporting; Writing – review & editing: Supporting*

*I.K. Conceptualization: Supporting; Formal analysis: Supporting; Writing – review & editing: Supporting*

*I.S. Conceptualization: Supporting; Formal analysis: Equal; Methodology: Equal; Writing – original draft: Equal*

*A.P. Conceptualization: Equal; Formal analysis: Equal; Funding acquisition: Equal; Methodology: Equal; Project administration: Equal; Writing – review & editing: Equal.*

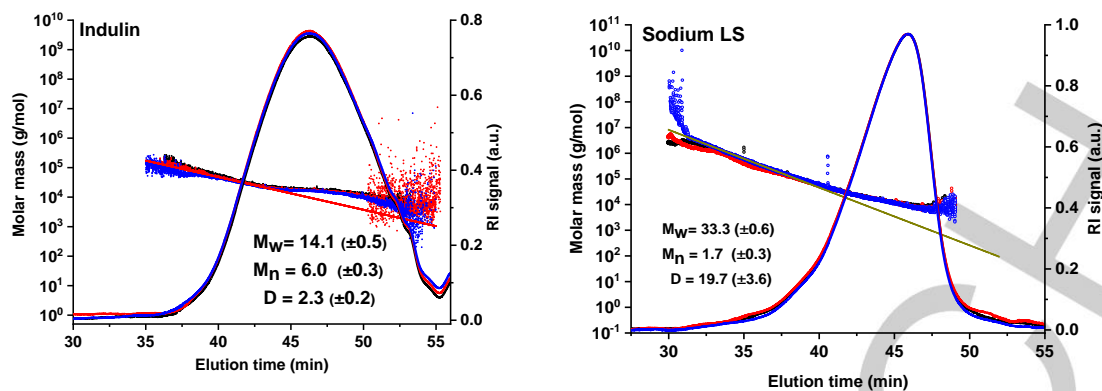

**Figure S1.** Repeatability of Indulin and Sodium LS samples. Average ( $10^3$  g/mol) of three single measurements (N=3) with time interval 24 h.

**Table S1.** Comparison of the statistical moments for kraft lignin fractions obtained by calibration with PSS, MALS-658 nm and MALS-785 nm signals of the FM with fluorescence filters and the results extrapolation).

| Lignin fractions<br>(cut-off) | Based on PSS ( $10^3$ g/mol) |       |       | MALS-658 nm ( $10^3$ g/mol) |       |       | MALS-785 nm ( $10^3$ g/mol) |       |       |
|-------------------------------|------------------------------|-------|-------|-----------------------------|-------|-------|-----------------------------|-------|-------|
|                               | $M_w$                        | $M_n$ | $M_z$ | $M_w$                       | $M_n$ | $M_z$ | $M_w$                       | $M_n$ | $M_z$ |
| 100                           | 3.6                          | 1.1   | 6.3   | 56.0                        | 73.5  | 30.0  | 24.5                        | 5.6   | 85.2  |
| 30                            | 2.9                          | 1.1   | 5.2   | 43.1                        | 40.0  | 46.0  | 9.1                         | 5.1   | 14.1  |
| 10                            | 2.3                          | 0.5   | 3.4   | 65.4                        | 14.4  | 49.4  | 7.5                         | 4.1   | 13.9  |
| 5                             | 1.1                          | 0.2   | 1.7   | 17.7                        | 11.1  | 27.0  | 3.0                         | 2.7   | 3.3   |
| 3                             | 0.5                          | 0.1   | 1.0   | 34.3                        | 7.3   | 93.0  | 1.5                         | 0.4   | 5.6   |
| 1                             | 0.3                          | 0.1   | 0.7   | 72.1                        | 62.2  | 82.7  | 0.8                         | 0.4   | 1.5   |
